# Supplementary material
Source: publisher site journal article supplement (https://www.dovepress.com/get_supplementary_file.php?f=329563.docx)
Supplement: Supplementary file 1 [file get_supplementary_file.php]

**Table S1.** Screening of *bla*OXA-232 positive *K. pneumoniae* from January 2019 to September 2020.

| **Strain isolation month** | **Number of isolated CRKP strains** | **Number of *bla*OXA-232 positive strains** | **Positive rate (%)** |
| --- | --- | --- | --- |
| 2019.01 | 32 | 0 | 0 |
| 2019.02 | 31 | 0 | 0 |
| 2019.03 | 37 | 0 | 0 |
| 2019.04 | 44 | 0 | 0 |
| 2019.05 | 58 | 0 | 0 |
| 2019.06 | 56 | 0 | 0 |
| 2019.07 | 32 | 0 | 0 |
| 2019.08 | 25 | 0 | 0 |
| 2019.09 | 28 | 1 | 3.60 |
| 2019.10 | 21 | 0 | 0 |
| 2019.11 | 22 | 1 | 4.5 |
| 2019.12 | 34 | 1 | 2.9 |
| 2020.01 | 26 | 12 | 46.2 |
| 2020.02 | 18 | 4 | 22.2 |
| 2020.03 | 30 | 3 | 10 |
| 2020.04 | 31 | 2 | 6.5 |
| 2020.05 | 16 | 1 | 6.2 |
| 2020.06 | 21 | 0 | 0 |
| 2020.07 | 18 | 0 | 0 |
| 2020.08 | 21 | 0 | 0 |
| 2020.09 | 9 | 0 | 0 |
| Total | 610 | 25 | 4.1 |


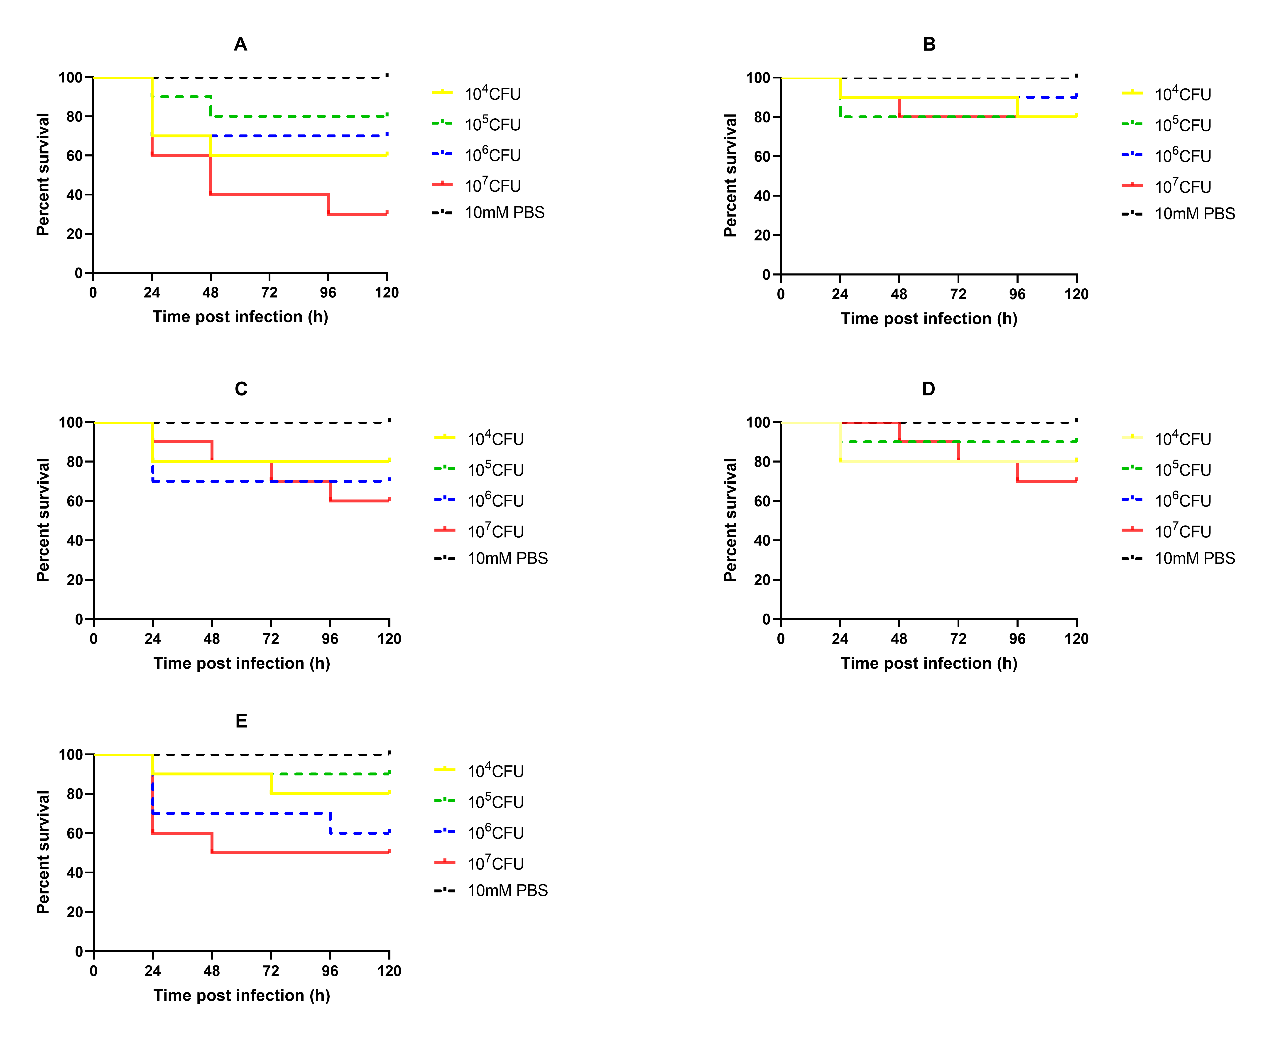


**Figure S1** The survival curve of *Galleria mellonella* larvae infected with the OXA-232-producing CRKP. Panel (A) shows the survival curve of *Galleria mellonella* larvae infected with the FK-LW strain. Panel (B) shows the survival curve of *Galleria mellonella* larvae infected with the FK-7859 strain. Panel (C) shows the survival curve of *Galleria mellonella* larvae infected with the FK-7779 strain. Panel (D) shows the survival curve of *Galleria mellonella* larvae infected with the FK-8190 strain. Panel (E) shows the survival curve of *Galleria mellonella* larvae infected with the FK-7853 strain.
